# Supplementary material for: Influence of Coping and Self-Efficacy in Inflammatory Bowel Disease
Source: MDPI journal article supplement (doi:10.3390/healthcare11081113), 2023-04-13
Supplement: s1 [file s1]

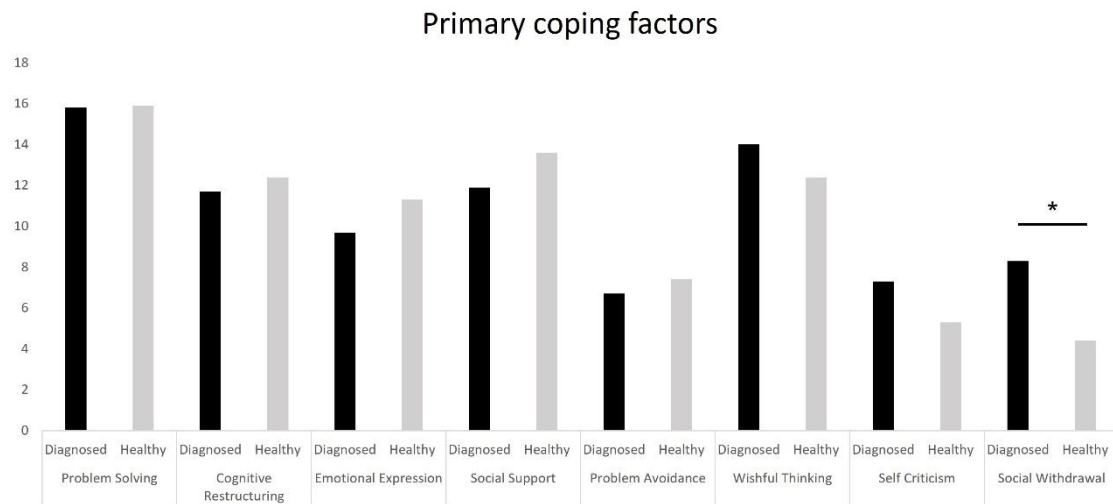

\*  $p < 0.05$

Figure S1: Total score of each of the eight primary coping factors according to diagnosis  
[People with inflammatory bowel disease (n = 56) vs Healthy subjects (n = 36)]

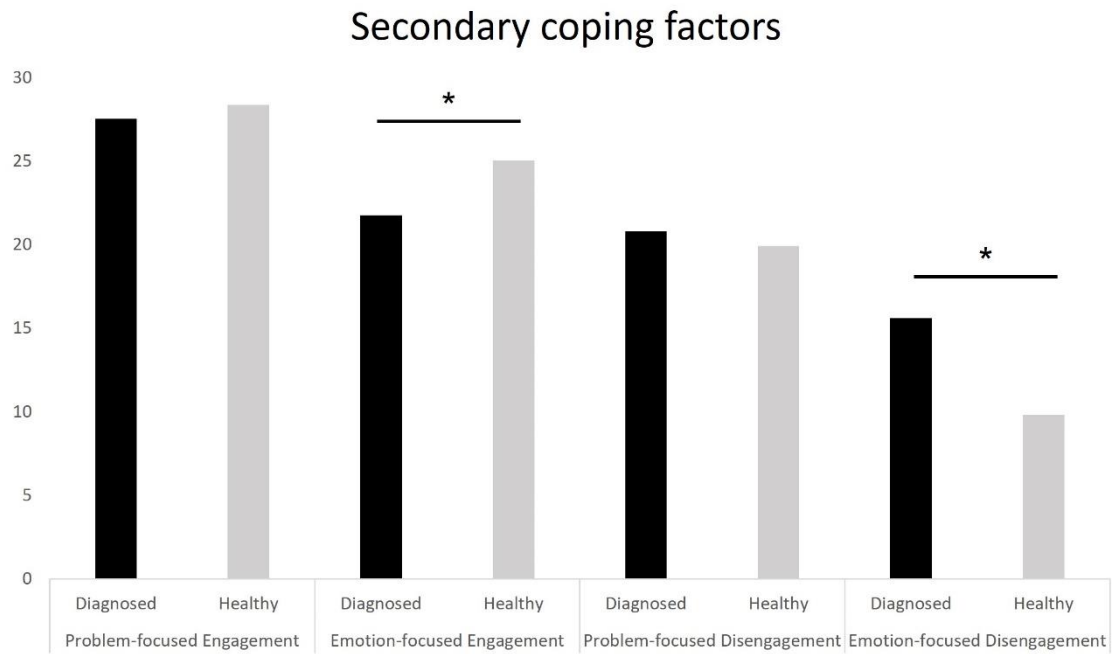

\*  $p < 0.05$

Figure S2: Total score of each of the four secondary coping factors according to diagnosis  
[People with inflammatory bowel disease ( $n = 56$ ) vs Healthy subjects ( $n = 36$ )]

## Tertiary coping factors

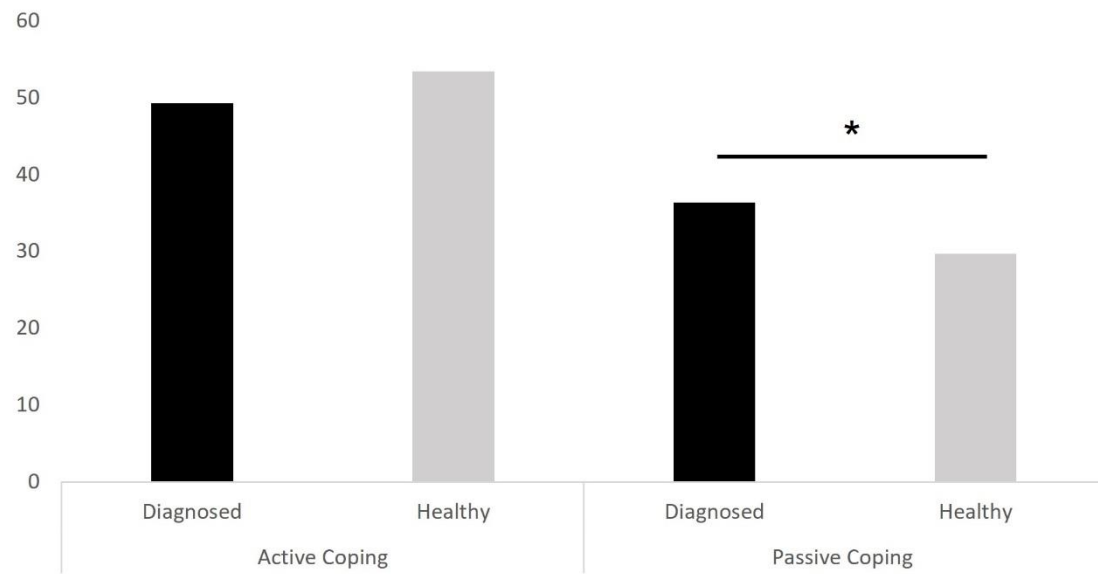

\*  $p < 0.05$

Figure S3: Total score of both tertiary coping factors according to diagnosis [People with inflammatory bowel disease (n = 56) vs Healthy subjects (n = 36)]
