# Supplementary material for: Influence of Coping and Self-Efficacy in Inflammatory Bowel Disease
Source: MDPI journal article supplement (doi:10.3390/healthcare11081113), 2023-04-13
Supplement: s1 [file s1]

**Table S1.** Total score of each of the eight primary factors per diagnosis (Crohn's Disease vs Ulcerative Colitis vs Healthy).

| Coping Mechanism        | Diagnosis          | <i>M</i>     | <i>SD</i> | <i>Min.</i> | <i>Max.</i> | <i>p-value</i> |
|-------------------------|--------------------|--------------|-----------|-------------|-------------|----------------|
| Problem Solving         | Crohn's Disease    | 16.06        | 4.38      | 2.0         | 20.0        | 0.828          |
|                         | Ulcerative Colitis | 15.43        | 3.67      | 7.0         | 20.0        |                |
|                         | Healthy            | 15.97        | 3.72      | 6.0         | 20.0        |                |
| Cognitive Restructuring | Crohn's Disease    | 11.70        | 4.97      | 0.0         | 20.0        | 0.803          |
|                         | Ulcerative Colitis | 11.74        | 4.66      | 4.0         | 20.0        |                |
|                         | Healthy            | 12.39        | 4.66      | 4.0         | 20.0        |                |
| Emotional Expression    | Crohn's Disease    | 9.67         | 4.56      | 0.0         | 20.0        | 0.257          |
|                         | Ulcerative Colitis | 9.96         | 4.80      | 1.0         | 19.0        |                |
|                         | Healthy            | 11.36        | 4.21      | 3.0         | 19.0        |                |
| Social Support          | Crohn's Disease    | 12.94        | 4.45      | 5.0         | 20.0        | 0.030 *        |
|                         | Ulcerative Colitis | <b>10.61</b> | 4.64      | 0.0         | 19.0        |                |
|                         | Healthy            | <b>13.67</b> | 3.94      | 3.0         | 20.0        |                |
| Problem Avoidance       | Crohn's Disease    | 6.36         | 4.10      | 0.0         | 16.0        | 0.149          |
|                         | Ulcerative Colitis | 7.26         | 4.06      | 1.0         | 17.0        |                |
|                         | Healthy            | 7.47         | 3.97      | 0.0         | 18.0        |                |
| Wishful Thinking        | Crohn's Disease    | 14.94        | 4.65      | 3.0         | 20.0        | 0.149          |
|                         | Ulcerative Colitis | 12.78        | 5.93      | 2.0         | 20.0        |                |
|                         | Healthy            | 12.47        | 5.17      | 1.0         | 20.0        |                |
| Self-criticism          | Crohn's Disease    | 7.03         | 6.43      | 0.0         | 20.0        | 0.149          |
|                         | Ulcerative Colitis | 7.70         | 6.92      | 0.0         | 20.0        |                |
|                         | Healthy            | 5.33         | 4.87      | 0.0         | 19.0        |                |
| Social Withdrawal       | Crohn's Disease    | <b>8.67</b>  | 4.85      | 0.0         | 20.0        | 0.001 **       |
|                         | Ulcerative Colitis | <b>7.78</b>  | 5.44      | 0.0         | 20.0        |                |
|                         | Healthy            | <b>4.47</b>  | 4.17      | 0.0         | 18.0        |                |

Note. Crohn's Disease, n = 33; Ulcerative Colitis, n = 23; Healthy Subjects, n = 36; total, N = 92. ANOVA test: \* p <0.05 / \*\* p <0.01 / \*\*\* p <0.001

**Table S2.** Total score of the four secondary factors per diagnosis (Crohn's Disease vs Ulcerative Colitis vs Healthy).

| Coping Mechanism              | Diagnosis          | <i>M</i>     | <i>SD</i> | <i>Min.</i> | <i>Max.</i> | <i>p-value</i> |
|-------------------------------|--------------------|--------------|-----------|-------------|-------------|----------------|
| Problem-Focused Engagement    | Crohn's Disease    | 27.76        | 7.65      | 8.0         | 40.0        | 0.826          |
|                               | Ulcerative Colitis | 27.17        | 6.87      | 13.0        | 40.0        |                |
|                               | Healthy            | 28.36        | 7.12      | 13.0        | 40.0        |                |
| Emotion-Focused Engagement    | Crohn's Disease    | 22.61        | 7.96      | 6.0         | 40.0        | 0.080          |
|                               | Ulcerative Colitis | 20.57        | 7.43      | 7.0         | 33.0        |                |
|                               | Healthy            | 25.03        | 7.00      | 9.0         | 36.0        |                |
| Problem-Focused Disengagement | Crohn's Disease    | 21.30        | 5.50      | 11.0        | 33.0        | 0.566          |
|                               | Ulcerative Colitis | 20.94        | 6.26      | 7.0         | 30.0        |                |
|                               | Healthy            | 19.94        | 5.45      | 10.0        | 31.0        |                |
| Emotion-Focused Disengagement | Crohn's Disease    | <b>15.70</b> | 9.32      | 0.0         | 35.0        | 0.017 *        |
|                               | Ulcerative Colitis | 15.48        | 11.43     | 0.0         | 40.0        |                |
|                               | Healthy            | <b>9.81</b>  | 7.74      | 0.0         | 31.0        |                |

Note. Crohn's Disease, n = 33; Ulcerative Colitis, n = 23; Healthy Subjects, n = 36; total, N = 92. ANOVA test: \* p <0.05 / \*\* p <0.01 / \*\*\* p <0.001

**Table S3.** Total score of both tertiary factors as per diagnosis (Crohn's Disease vs Ulcerative Colitis vs Healthy).

| Coping Mechanism | Diagnosis          | <i>M</i> | <i>SD</i> | <i>Min.</i> | <i>Max.</i> | <i>p-value</i> |
|------------------|--------------------|----------|-----------|-------------|-------------|----------------|
| Active Coping    | Crohn's Disease    | 50.36    | 13.36     | 24.0        | 77.0        | 0.208          |
|                  | Ulcerative Colitis | 47.74    | 11.08     | 28.0        | 65.0        |                |
|                  | Healthy            | 53.39    | 11.31     | 27.0        | 74.0        |                |
| Passive Coping   | Crohn's Disease    | 37.00    | 12.69     | 16.0        | 63.0        | 0.053          |
|                  | Ulcerative Colitis | 35.52    | 15.77     | 9.0         | 59.0        |                |
|                  | Healthy            | 29.75    | 10.70     | 13.0        | 52.0        |                |

Note. Crohn's Disease, n = 33; Ulcerative Colitis, n = 23; Healthy Subjects, n = 36; total, N = 92. ANOVA test: \* p <0.05 / \*\* p <0.01 / \*\*\* p <0.001
